# Supplementary material for: Timing of early water intake post-general anaesthesia: a systematic review and meta-analysis
Source: PubMed Central journal article supplement (PMC11003094; doi:10.1186/s12871-024-02520-x), 2024-04-09
Supplement: 12871_2024_2520_MOESM1_ESM.pdf [file 12871_2024_2520_MOESM1_ESM.pdf]

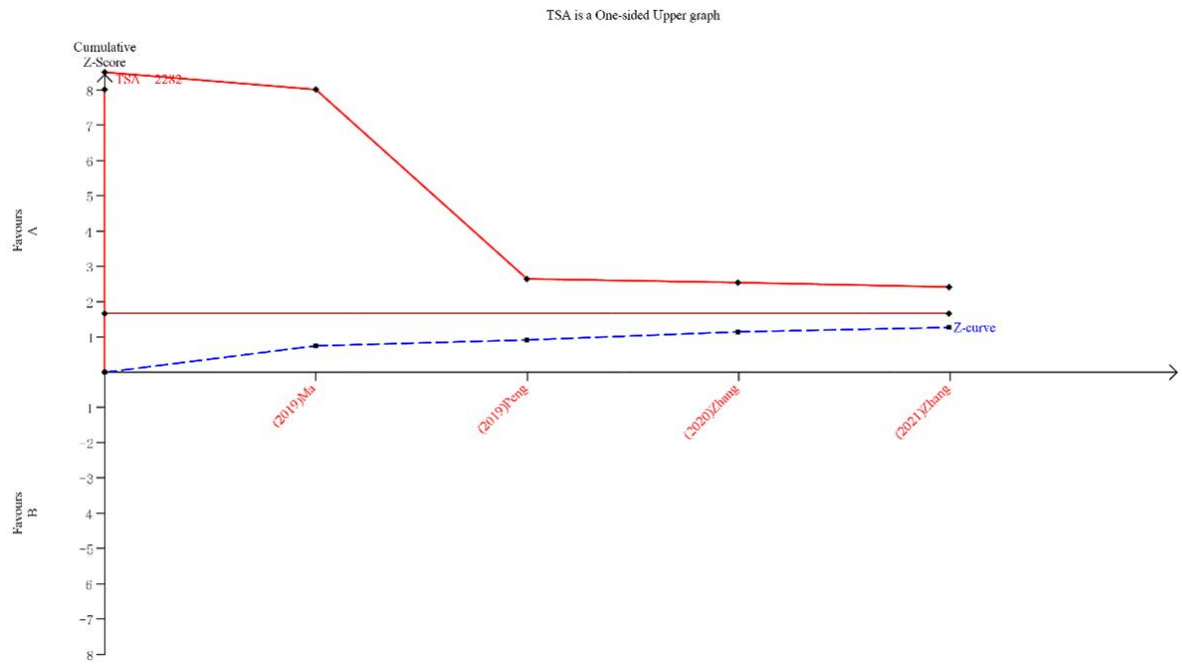

Supplementary Fig.1. Trial sequential analysis for vomiting.

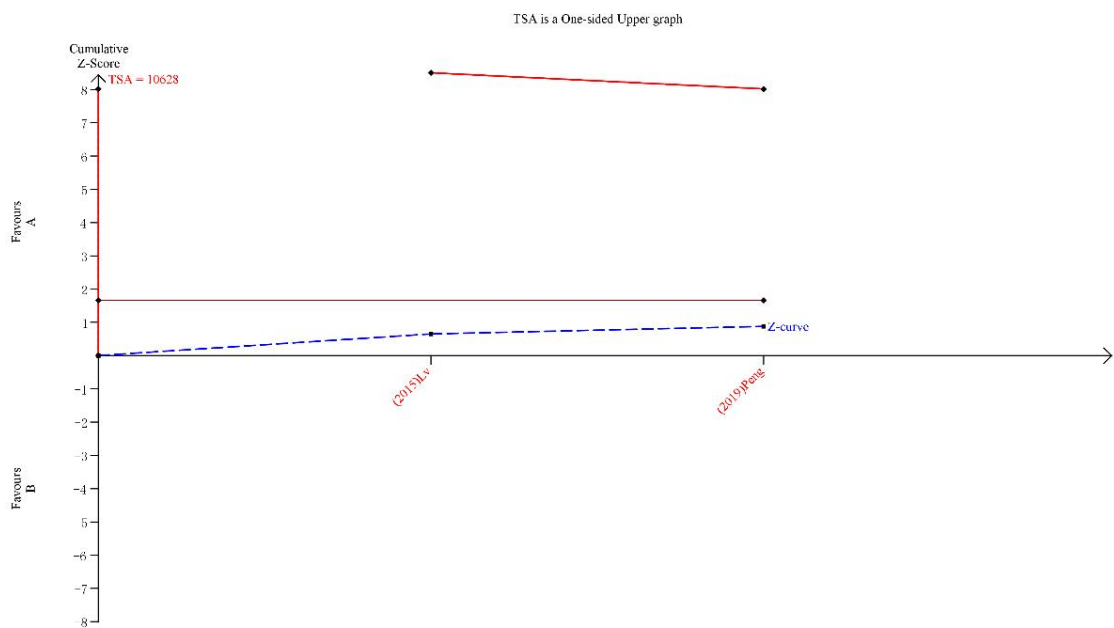

Supplementary Fig.2. Trial sequential analysis for aspiration.

Supplementary Table 1. Results of GRADE evaluation.

| Outcome | MD/OR (95%CI) | Number of studies | Quality of evidence | Reasons |
|---------|---------------|-------------------|---------------------|---------|
|---------|---------------|-------------------|---------------------|---------|

|                       |                          |   |      |                          |                                                   |
|-----------------------|--------------------------|---|------|--------------------------|---------------------------------------------------|
| Vomiting              | 0.81(0.58-1.12)          | 4 | ⊕⊕⊕○ | Risk of bias<br>moderate | was “serious”.                                    |
| Aspiration            | 0.78(0.45-1.37)          | 2 | ⊕⊕⊕○ | Risk of bias<br>moderate | was “serious”.                                    |
| Nausea                | 0.89(0.69-1.15)          | 5 | ⊕⊕⊕○ | Risk of bias<br>moderate | was “serious”.                                    |
| Degree of thirst      | -9.44 (-12.04-<br>-6.83) | 7 | ⊕⊕○○ | Risk of bias<br>low      | was “serious”;<br>inconsistency<br>was “serious”. |
| Anal exhaust time     | -5.48(-7.74-<br>-3.22)   | 5 | ⊕⊕○○ | Risk of bias<br>low      | was “serious”;<br>inconsistency<br>was “serious”. |
| First defecation time | -6.34(-8.90-<br>-3.79)   | 3 | ⊕⊕○○ | Risk of bias<br>low      | was “serious”;<br>inconsistency<br>was “serious”. |

MD, mean difference; OR, odds ratio; CI, confidence interval
